# Supplementary material for: Effects of supercoiling on enhancer–promoter contacts
Source: PubMed Central journal article supplement (PMC4176356; doi:10.1093/nar/gku759), 2014-08-14
Supplement: supp_gku759_nar-01462-f-2014-File008.pdf [file supp_gku759_nar-01462-f-2014-File008.pdf]

Table S1: Datapoints for figure 2.

| $\Delta l_k$ | $\epsilon$ | $\langle t_{on/t_{total}} \rangle$ | $\langle t_{on/t_{total}} \rangle$ error |
|--------------|------------|------------------------------------|------------------------------------------|
| 1            | 1          | 0.00268                            | 0.00013                                  |
| 1            | 2          | 0.00335                            | 0.00017                                  |
| 1            | 3          | 0.00383                            | 0.00019                                  |
| 1            | 4          | 0.0054                             | 0.0003                                   |
| 1            | 5          | 0.0135                             | 0.0007                                   |
| 1            | 6          | 0.0258                             | 0.0013                                   |
| 1            | 7          | 0.051                              | 0.003                                    |
| 1            | 8          | 0.118                              | 0.006                                    |
| 1            | 9          | 0.218                              | 0.01                                     |
| 1            | 10         | 0.429                              | 0.017                                    |
| 1            | 11         | 0.639                              | 0.017                                    |
| 1            | 12         | 0.729                              | 0.012                                    |
| 2            | 1          | 0.00245                            | 0.00012                                  |
| 2            | 2          | 0.00281                            | 0.00014                                  |
| 2            | 3          | 0.0045                             | 0.0002                                   |
| 2            | 4          | 0.0077                             | 0.0004                                   |
| 2            | 5          | 0.0149                             | 0.0007                                   |
| 2            | 6          | 0.0299                             | 0.0015                                   |
| 2            | 7          | 0.059                              | 0.003                                    |
| 2            | 8          | 0.129                              | 0.006                                    |
| 2            | 9          | 0.23                               | 0.011                                    |
| 2            | 10         | 0.44                               | 0.02                                     |
| 2            | 11         | 0.6104                             | 0.0006                                   |
| 2            | 12         | 0.741                              | 0.014                                    |
| 3            | 1          | 0.00238                            | 0.00012                                  |
| 3            | 2          | 0.00379                            | 0.00019                                  |
| 3            | 3          | 0.0054                             | 0.0003                                   |
| 3            | 4          | 0.0086                             | 0.0004                                   |
| 3            | 5          | 0.0158                             | 0.0008                                   |
| 3            | 6          | 0.036                              | 0.0018                                   |
| 3            | 7          | 0.07                               | 0.003                                    |
| 3            | 8          | 0.15                               | 0.007                                    |
| 3            | 9          | 0.275                              | 0.013                                    |
| 3            | 10         | 0.43                               | 0.015                                    |
| 3            | 11         | 0.618                              | 0.015                                    |
| 3            | 12         | 0.767                              | 0.01                                     |

Sheet1

|   |    |         |         |
|---|----|---------|---------|
| 4 | 1  | 0.00314 | 0.00016 |
| 4 | 2  | 0.00379 | 0.00019 |
| 4 | 3  | 0.006   | 0.0003  |
| 4 | 4  | 0.0105  | 0.0005  |
| 4 | 5  | 0.0147  | 0.0007  |
| 4 | 6  | 0.0367  | 0.0018  |
| 4 | 7  | 0.061   | 0.003   |
| 4 | 8  | 0.158   | 0.008   |
| 4 | 9  | 0.32    | 0.014   |
| 4 | 10 | 0.512   | 0.017   |
| 4 | 11 | 0.669   | 0.007   |
| 4 | 12 | 0.809   | 0.015   |
| 5 | 1  | 0.004   | 0.0002  |
| 5 | 2  | 0.0044  | 0.0002  |
| 5 | 3  | 0.0081  | 0.0004  |
| 5 | 4  | 0.0116  | 0.0005  |
| 5 | 5  | 0.0237  | 0.0012  |
| 5 | 6  | 0.05    | 0.002   |
| 5 | 7  | 0.096   | 0.005   |
| 5 | 8  | 0.185   | 0.009   |
| 5 | 9  | 0.335   | 0.013   |
| 5 | 10 | 0.54    | 0.03    |
| 5 | 11 | 0.691   | 0.007   |
| 5 | 12 | 0.822   | 0.011   |
| 6 | 1  | 0.0044  | 0.0002  |
| 6 | 2  | 0.0049  | 0.0002  |
| 6 | 3  | 0.0086  | 0.0004  |
| 6 | 4  | 0.0149  | 0.0007  |
| 6 | 5  | 0.0279  | 0.0014  |
| 6 | 6  | 0.063   | 0.003   |
| 6 | 7  | 0.104   | 0.005   |
| 6 | 8  | 0.217   | 0.004   |
| 6 | 9  | 0.379   | 0.006   |
| 6 | 10 | 0.58    | 0.03    |
| 6 | 11 | 0.7     | 0.007   |
| 6 | 12 | 0.824   | 0.01    |
| 7 | 1  | 0.0058  | 0.0003  |
| 7 | 2  | 0.0077  | 0.0004  |
| 7 | 3  | 0.01    | 0.0005  |
| 7 | 4  | 0.0167  | 0.0008  |

Sheet1

|    |    |        |        |
|----|----|--------|--------|
| 7  | 5  | 0.0261 | 0.0013 |
| 7  | 6  | 0.064  | 0.003  |
| 7  | 7  | 0.111  | 0.005  |
| 7  | 8  | 0.24   | 0.005  |
| 7  | 9  | 0.428  | 0.009  |
| 7  | 10 | 0.631  | 0.013  |
| 7  | 11 | 0.748  | 0.007  |
| 7  | 12 | 0.857  | 0.005  |
| 8  | 1  | 0.006  | 0.0003 |
| 8  | 2  | 0.0071 | 0.0004 |
| 8  | 3  | 0.0113 | 0.0006 |
| 8  | 4  | 0.0206 | 0.001  |
| 8  | 5  | 0.0383 | 0.0019 |
| 8  | 6  | 0.066  | 0.003  |
| 8  | 7  | 0.148  | 0.006  |
| 8  | 8  | 0.239  | 0.012  |
| 8  | 9  | 0.42   | 0.02   |
| 8  | 10 | 0.628  | 0.009  |
| 8  | 11 | 0.74   | 0.02   |
| 8  | 12 | 0.838  | 0.008  |
| 9  | 1  | 0.0056 | 0.0003 |
| 9  | 2  | 0.0075 | 0.0004 |
| 9  | 3  | 0.0133 | 0.0007 |
| 9  | 4  | 0.0235 | 0.0011 |
| 9  | 5  | 0.0431 | 0.0019 |
| 9  | 6  | 0.082  | 0.004  |
| 9  | 7  | 0.144  | 0.007  |
| 9  | 8  | 0.294  | 0.012  |
| 9  | 9  | 0.508  | 0.015  |
| 9  | 10 | 0.682  | 0.016  |
| 9  | 11 | 0.797  | 0.012  |
| 9  | 12 | 0.832  | 0.011  |
| 10 | 1  | 0.0076 | 0.0004 |
| 10 | 2  | 0.0087 | 0.0004 |
| 10 | 3  | 0.0131 | 0.0007 |
| 10 | 4  | 0.0226 | 0.0011 |
| 10 | 5  | 0.046  | 0.002  |
| 10 | 6  | 0.075  | 0.004  |
| 10 | 7  | 0.174  | 0.008  |
| 10 | 8  | 0.332  | 0.007  |

Sheet1

|    |    |       |       |
|----|----|-------|-------|
| 10 | 9  | 0.54  | 0.018 |
| 10 | 10 | 0.692 | 0.007 |
| 10 | 11 | 0.808 | 0.01  |
| 10 | 12 | 0.873 | 0.007 |
